# Supplementary material for: Gypenosides Altered Hepatic Bile Acids Homeostasis in Mice Treated with High Fat Diet
Source: Evid Based Complement Alternat Med. 2018 Jul 12;2018:8098059. doi: 10.1155/2018/8098059 (PMC6076974; doi:10.1155/2018/8098059)
Supplement: Supplementary 2 — Original data of the present study. [file 8098059.f2.xlsx]

## Sheet: Fig1.A
Mice body weight levels were increased significantly by high fat diet at week 16
Group	Subgroup SN	Body Weight (g)
ND 0W	1	28.6
ND 0W	2	30.8
ND 0W	3	30.1
ND 0W	4	29.8
ND 0W	5	25
ND 0W	6	31
ND 0W	7	25.9
ND 0W	8	28.2
ND 0W	9	29.3
ND 0W	10	30
ND 0W	11	28.7
HFD 0W	1	27.8
HFD 0W	2	31.2
HFD 0W	3	27.2
HFD 0W	4	28.6
HFD 0W	5	31.1
HFD 0W	6	29.9
HFD 0W	7	28.5
HFD 0W	8	28.6
HFD 0W	9	31
HFD 0W	10	27.4
HFD 0W	11	27.7
ND 16W	1	31.4
ND 16W	2	31.7
ND 16W	3	31.7
ND 16W	4	32.2
ND 16W	5	29.2
ND 16W	6	35.4
ND 16W	7	27.2
ND 16W	8	29.9
ND 16W	9	32.1
ND 16W	10	31.9
ND 16W	11	31.2
HFD 16W	1	41.3
HFD 16W	2	31.4
HFD 16W	3	48.5
HFD 16W	4	44.1
HFD 16W	5	45.1
HFD 16W	6	52.4
HFD 16W	7	31
HFD 16W	8	39.5
HFD 16W	9	49.6
HFD 16W	10	44.9
HFD 16W	11	31.8

## Sheet: Fig1.B
Serum total cholesterol (TC) and low density lipoprotein cholesterol (LDL-C) levels were induced by high fat diet at week 16
Group	Subgroup SN	TC (Fold Change vs ND)	LDL-C (Fold Change vs ND)
ND 16W	1	1.08445	0.739212
ND 16W	2	0.927487	0.76515
ND 16W	3	0.970294	1.05565
ND 16W	4	0.919402	0.791087
ND 16W	5	1.04687	0.542089
ND 16W	6	0.829507	0.140061
ND 16W	7	0.956025	0.884461
ND 16W	8	1.12107	1.80005
ND 16W	9	1.0464	1.83117
ND 16W	10	1.29563	1.93751
ND 16W	11	0.802871	0.513558
HFD 16W	1	1.62619	3.27588
HFD 16W	2	1.18576	2.10351
HFD 16W	3	1.68232	3.14619
HFD 16W	4	1.80123	4.68946
HFD 16W	5	1.75366	5.32752
HFD 16W	6	1.952	7.23131
HFD 16W	7	0.626411	0.492808
HFD 16W	8	1.56056	2.42254
HFD 16W	9	1.41026	1.53289
HFD 16W	10	1.59813	2.89719
HFD 16W	11	1.5206	2.88163

## Sheet: Fig.2A
Both gypenosides and simvastatin reduced the serum total cholesterol (TC) and low density lipoprotein cholesterol (LDL-C) levels in serum of mice treated by high fat diet
Group	Subgroup SN	TC (Fold Change vs ND)	LDL-C (Fold Change vs ND)
ND	1	1.0675	0.290129
ND	2	0.925371	0.525081
ND	3	1.03718	0.387136
ND	4	0.996129	1.17031
ND	5	1.15388	1.63754
ND	6	1.08159	1.42662
ND	7	0.825819	0.873058
ND	8	0.959372	1.50672
ND	9	1.01114	1.2157
ND	10	1.07761	1.42751
ND	11	0.864415	0.54021
HFD	2	1.66282	1.12091
HFD	3	2.77979	3.24037
HFD	4	1.68855
HFD	5	1.61963	2.13058
HFD	6	2.7366	3.30667
HFD	7		1.25752
HFD	8	2.69065	1.23172
HFD	9	1.70524	1.09377
HFD+GP	1	1.29645	0.806656
HFD+GP	2	1.89213	1.4336
HFD+GP	4	1.49807	0.573439
HFD+GP	5	0.882444	0.482896
HFD+GP	6		1.08103
HFD+GP	7	0.78654	1.31425
HFD+GP	8	1.66487
HFD+GP	9	1.65917	0.604992
HFD+GP	10	1.89846
HFD+GP	11	1.2955
HFD+ST	1	1.12029	0.539176
HFD+ST	2	1.04857	0.344174
HFD+ST	3	1.07071	0.603877
HFD+ST	4	0.710274	0.749903
HFD+ST	5	1.68713	1.43645
HFD+ST	6	1.42897	0.763832
HFD+ST	7	0.909512	0.692841
HFD+ST	8	1.0439	0.474475
HFD+ST	10	0.834057	0.850999
HFD+ST	11	1.5462	0.774616

## Sheet: Fig. 3
Gypenosides changed the gene expression levels of mouse hepatic Cyp7a1 and Cyp8b1 which were two rate-limit enzymes of bile acids biosynthesis
Group	Subgroup SN	Cyp7a1(Fold Change vs ND)	Cyp8b1(Fold Change vs ND)
ND	1	1.97266	1.39428
ND	2	1.35253	1.17858
ND	3	1.30545	1.39953
ND	4	0.611257	0.66819
ND	5	1.28444	1.87306
ND	7	0.472112	0.691276
ND	8	1.58759	1.08864
ND	9	0.347354	0.631792
ND	10	0.578456	0.477664
ND	11	0.488143	0.59699
HFD	3	0.104173	0.103995
HFD	4	0.424354	0.483829
HFD	5	0.13796	0.159063
HFD	6	0.153808	0.115927
HFD	7	0.0883583	0.232215
HFD+GP	1	4.79818	0.532015
HFD+GP	2	1.53464	0.490273
HFD+GP	4	3.30448	0.513615
HFD+GP	5	2.99168	0.536838
HFD+GP	7	3.07688	0.433449
HFD+GP	8	2.32907	0.373159
HFD+GP	9	1.38159	0.233951
HFD+GP	10	0.285013	0.24916
HFD+GP	11	4.85999	0.718642

## Sheet: Fig. 4
Gypenosides changed the expression levels of genes involved in hepatic pathway of bile acids homeostasis regulations
Group	Subgroup SN	Fxr (Fold Change vs ND)	Shp (Fold Change vs ND)	Lrh1 (Fold Change vs ND)	Hnf4α (Fold Change vs ND)
ND	1	1.06561	0.860993	1.20624	1.03434
ND	2	1.34633	1.06562	1.33453	1.31964
ND	3	1.14523	1.13455	1.28416	0.868854
ND	4	0.851288	0.923165	1.00483	0.782293
ND	5	0.842478	2.25716	1.13918	1.16172
ND	7	0.798227	0.689592	0.674143	0.879587
ND	8	1.12516	1.08759	0.875469	1.231
ND	9	1.05631	0.663601	0.859713	0.768101
ND	10	1.04089	0.953701	0.811417	1.30756
ND	11	0.728472	0.364029	0.81032	0.646908
HFD	3	0.186222	0.25945	0.211679	0.201948
HFD	4	0.665078	0.337165	0.471173	0.635852
HFD	5	0.496581	0.696046	0.487924	0.514659
HFD	6	0.510799	0.47122	0.504212	0.608399
HFD	7	0.4467	0.430366	0.425739	0.451247
HFD+GP	1	1.41357	0.301503	1.61149	0.562715
HFD+GP	2	0.958596	0.385037	0.708233	0.34711
HFD+GP	4	1.03748	0.120118	0.868352	0.498502
HFD+GP	5	1.15719	0.105673	1.22668	0.8466
HFD+GP	7	1.0519	0.088404	1.16945	0.635023
HFD+GP	8	1.25778	0.0905868	0.729412	0.419461
HFD+GP	9	1.03434	0.106317	0.859265	0.466057
HFD+GP	10	0.542652	0.302512	0.244891	0.352216
HFD+GP	11	2.6243	0.151955	1.40726	0.544063

## Sheet: Fig. 5
Gypenosides changed the expression levels of genes involved in entero-hepatic pathway of bile acids homeostasis regulations
Group	Subgroup SN	Fxr.I (Fold Change vs ND)	Fgf15.I (Fold Change vs ND)	Fgfr4 (Fold Change vs ND)	Jnk1 (Fold Change vs ND)	Jnk2 (Fold Change vs ND)	Erk1 (Fold Change vs ND)	Erk2 (Fold Change vs ND)
ND	1	0.822226	1.39658	1.02005	1.15192	1.47419	1.50195	0.797245
ND	2	0.940959	0.710916	1.39051	1.99614	1.66331	1.50572	1.44539
ND	3	0.854826	0.70839	1.35754	1.18014	1.29863	1.2594	1.43948
ND	4	0.673478	0.637554	0.757216	0.622089	1.06626	0.789404	1.09627
ND	5	0.929426	1.22554	1.24358	1.11547	1.28785	1.14282	1.32735
ND	7	0.860117	0.952872	0.961687	0.780867	0.756764	0.730956	0.945504
ND	8	1.17518	0.830862	1.28518	0.70695	0.557052	1.25449	1.29536
ND	9	1.3144	0.963087	0.712284	1.04904	0.582021	0.661339	0.626397
ND	10	1.21115	1.72904	0.671425	0.759798	0.655151	0.580907	0.476752
ND	11	1.21824	0.845166	0.600531	0.637579	0.658773	0.573011	0.550257
HFD	3	0.315752	0.287176	0.298385	0.133992	0.204232	0.210691	0.199142
HFD	4	0.489624	0.727985	0.421582	0.552764	0.640871	0.509562	0.537277
HFD	5	0.305053	0.43663	0.688015	0.343043	0.56398	0.497282	0.369232
HFD	6	0.534313	0.486016	0.669881	0.315922	0.478578	0.420313	0.525517
HFD	7	0.331901	0.409776	0.510637	0.238595	0.447742	0.36478	0.501567
HFD+GP	1	0.387654	0.419507	1.29349	1.64837	1.67683	1.37887	1.87184
HFD+GP	2	0.317586	0.754788	0.370278	0.954067	0.959542	0.676605	1.10054
HFD+GP	4	0.572423	0.542717	0.695849	0.790346	0.881347	0.793881	1.09347
HFD+GP	5	0.494816	0.618164	0.607666	0.78556	0.868316	0.955116	0.963271
HFD+GP	7	0.621107	2.15091	0.572478	0.738808	0.917222	0.95093	1.35876
HFD+GP	8	0.506886	0.317738	0.674268	1.08256	0.792929	0.86051	1.11634
HFD+GP	9	0.485186	1.63471	0.621918	0.561727	0.770298	0.595831	1.2289
HFD+GP	10	0.314983	0.361629	0.309644	0.108712	0.42078	0.341521	0.756899
HFD+GP	11	0.51563	0.761503	0.724836	0.131731	1.19413	0.57088	1.22544

## Sheet:  Fig.6A
Score plots of principle component analysis on bile acids profiles. Each spot represents a mouse sample. Gypenosides made the location of mice shift away high fat diet group
Group	Subgroup SN	PC1	PC2
ND	2	2.09703	-0.740352
ND	3	0.765258	-0.802936
ND	6	0.120345	-0.490739
ND	10	1.38115	-0.631109
ND	11	0.730136	-1.21189
HFD	3	-1.50299	-1.43054
HFD	4	-1.60025	-0.677749
HFD	5	-1.45026	-0.190604
HFD	6	-0.871913	0.480339
HFD	7	-1.01301	0.461579
HFD+GP	1	0.496991	0.878622
HFD+GP	2	0.125339	1.19938
HFD+GP	4	0.16683	0.93845
HFD+GP	5	0.586872	1.10646
HFD+GP	9	-0.0315305	1.11109

## Sheet: Fig.6B
Loading plots of principle component analysis. Each spot represents a bile acid. Location of bile acids on loading plots represents its contribution on components.
	PC1	PC2
TCA	0.0906688	-0.256192
TUDCA	-0.38459	-0.213912
THDCA	-0.319508	-0.338847
TCDCA	-0.120947	0.281157
TDCA	0.268129	-0.0111476
TLCA	0.0440206	-0.0767885
GCA	0.0915028	-0.449346
GCDCA	-0.222107	-0.46641
GDCA	-0.155586	-0.189786
CA	0.503176	-0.471422
UDCA	0.178305	-0.0726725
HDCA	0.155412	-0.00424454
CDCA	0.291153	0.0706488
DCA	0.421321	0.0268721

## Sheet: Fig.7
Mouse hepatic bile acids levels shown as histograms
Group	Subgroup SN	TCA(Fold Change vs ND)	TUDCA(Fold Change vs ND)	THDCA(Fold Change vs ND)	TCDCA(Fold Change vs ND)	TDCA(Fold Change vs ND)	TLCA(Fold Change vs ND)	GCA(Fold Change vs ND)	GCDCA(Fold Change vs ND)	GDCA(Fold Change vs ND)	CA(Fold Change vs ND)	UDCA(Fold Change vs ND)	HDCA(Fold Change vs ND)	CDCA(Fold Change vs ND)	DCA(Fold Change vs ND)
ND	1	1.37734	1.11358	2.25964	1.22829	1.83286	1.73204	1.4539	1.05018	1.08648	0.183512	0.412373	0.811171	1.83534	0.718167
ND	2	0.625075	0.970712	1.39848	0.756516	1.05118	1.1438	0.770547	0	0.90715	2.34108	1.0174	0.978887	1.24206	1.82658
ND	3	1.17116	1.22238	1.00757	1.23733	1.0354	1.37757	0.919013	1.6029	1.10198	0.817809	0.682966	1.44489	1.37418	1.18729
ND	4	0.425719	0.30003	0.29642	0.558115	0.339144	0.614917	0.243963	1.5534	1.1104	0.349447	0.277772	0.579893	0.240622	0.228497
ND	5	1.30417	1.2745	0.992193	2.13349	1.27234	1.65352	1.63501	1.33955	1.11158	0.266747	0.404576	0.693466	0.425354	0.401306
ND	6	1.08562	0.953539	0.94522	0.962321	0.771216	1.54292	1.27456	1.18775	1.0859	0.110422	0.899771	1.0945	0.866732	0.385201
ND	7	0.974901	1.41516	0.43114	0.637971	0.938967	0.421336	0.978294	0.718571	1.13192	2.48198	3.08278	1.71986	1.04831	2.35703
ND	8	1.33497	1.43216	1.29104	1.52113	1.39017	0.869897	1.26005	1.19546	1.04262	0.793466	2.90864	1.85658	2.0127	1.49217
ND	9	0.411832	0.432879	0.418198	0.414835	0.445489	0.460911	0.237841	0.518279	0.661646	0.447834	0.405363	0.521154	0.482126	0.386377
ND	10	0.912915	0.691756	0.488161	0.369385	1.22709	0.59651	1.11499	1.0657	0.75212	1.2556	0.518774	0.542247	0.800861	1.35773
ND	11	1.3763	1.1933	1.47194	1.18062	0.696146	0.586569	1.11183	0.768207	1.0082	1.95211	0.389579	0.757349	0.671716	0.659668
HFD	3	0.750732	2.2643	2.82298	1.04926	0.388036	0.840494	1.75993	1.11483	1.21989	0.0927335	0.272453	0.468206	0.328274	0.362358
HFD	4	1.04889	2.35933	2.38881	1.6986	0.446879	1.19176	0.535786	1.09081	1.33952	0.0713951	0.286055	0.456174	0.37721	0.224815
HFD	5	0.266817	2.14813	1.37311	0.990385	0.166579	0.589852	0.0934029	1.69856	0.773853	0.0170875	0.221627	0.475238	0.324101	0.153405
HFD	6	0.295649	1.39232	0.924257	0.777252	0.284389	0.425129	0	0.518752	1.68686	0.042014	0.111706	0.292707	0.250799	0.240866
HFD	7	0.28328	1.3053	1.28229	1.16674	0.128672	0.611253	0	0.783158	1.18004	0	0.126593	0.853265	0.229568	0.0961799
HFD+GP	1	0.469389	1.24844	1.07063	0.892566	1.00023	0.882844	0.287702	0	0	0.0523264	0.515725	0.86948	1.00856	1.08336
HFD+GP	2	0.706883	0.928374	1.1747	2.53626	0.810282	1.20888	0.251561	0	0.682985	0.0220664	0.298546	0.607478	0.896578	1.05771
HFD+GP	4	0.396783	1.23497	1.11744	1.96423	0.873165	1.34156	0.209291	0	1.27409	0.0474349	0.544012	1.16159	0.91431	1.11791
HFD+GP	5	0.484179	0.938863	0.679823	0.879388	0.685792	0.128293	0.263876	0	0.375813	0.0284536	0.455876	0.97322	1.3719	0.898154
HFD+GP	7	0.37171	1.20697	1.88369	1.95188	0.92995	1.37113	0.294261	0	0.453702	0.0483928	0.851469	2.11636	1.18303	0.587925
HFD+GP	8	0.562286	1.21476	2.03906	2.15347	0.922048	0.923987	0.0891767	0	0.753347	0.0399901	0.448877	3.46652	0.893305	0.967388
HFD+GP	9	0.487961	0.978393	1.01003	2.07385	0.665153	0.808337	0.469819	0	0.498875	0.0341385	0.33315	0.456692	0.744433	0.671051
HFD+GP	10	0.14776	0.268418	0.266466	0.683482	0.164694	0.242083	0.0777539	0	0.808759	0.0135082	0	0	0	0.284878
